## Retraction

## Retraction of: miR-627-3p inhibits osteosarcoma cell proliferation and metastasis by targeting PTN

Ming He<sup>1</sup>, Peng Shen<sup>1</sup>, Chuang Qiu<sup>1</sup>, Jiashi Wang<sup>1</sup>

<sup>1</sup>Department of Orthopedic Surgery, Shengjing Hospital of China Medical University, Shenyang 110004, People's Republic of China

Correspondence to: Jiashi Wang; email: [wangjiashi2016@sina.com](mailto:wangjiashi2016@sina.com)

Keywords: PTN, osteosarcoma, miR-627-3p, proliferation, metastasis

Original article: *Aging (Albany NY)* 2019; 11: pp 7780–7795

PMID: [31413208](https://pubmed.ncbi.nlm.nih.gov/31413208/)

PMCID: [PMC6710034](https://pubmed.ncbi.nlm.nih.gov/PMC6710034/)

doi: [10.18632/aging.102157](https://doi.org/10.18632/aging.102157)

**This article has been retracted:** Aging has completed its investigation of this paper. Multiple concerns were raised about this paper, including internal duplications and overlap with unrelated papers from different institutions. The internal duplications were found in Transwell assay images in **Figures 4A–4D** and **5B, 5F**. We also found that the authors reused Transwell assay images and Western blot images from unrelated experiments published earlier in **Figures 4A, 4C, 4D** and **5B** [1, 2] and in **Figures 3G** [3] and **5C** [4]. The external duplications/overlap were with unrelated articles from different institutions, submitted to journals between 2014 and June 2019, before the submission date of the article of interest. These include Transwell assay images in **Figures 4A** [5–7], **4A, 5F** [8], **4A, 4D** and **5B** [9] as well as Western blot images in **Figures 4F** [10] and **5G** [11] and duplication of a flow cytometry image in **Figure 3E** [12].

The Scientific Integrity office at Aging contacted the authors, but the authors did not respond to requests to clarify, and the paper was retracted based on an Editorial decision. The Scientific Integrity office also notified the authors' Institutions about this retraction and added their names to an Editorial Warning list.

### REFERENCES

1. Jiashi W, Chuang Q, Zhenjun Z, Guangbin W, Bin L, Ming H. MicroRNA-506-3p inhibits osteosarcoma cell proliferation and metastasis by suppressing RAB3D expression. *Aging (Albany NY)*. 2018; 10:1294–305. <https://doi.org/10.18632/aging.101468>  
PMID:[29905536](https://pubmed.ncbi.nlm.nih.gov/29905536/)
2. Ming H, Chuang Q, Jiashi W, Bin L, Guangbin W, Xianglu J. Naringin targets Zeb1 to suppress osteosarcoma cell proliferation and metastasis. *Aging (Albany NY)*. 2018; 10:4141–51. <https://doi.org/10.18632/aging.101710>  
PMID:[30580326](https://pubmed.ncbi.nlm.nih.gov/30580326/)
3. Wang J, Wang G, Li B, Qiu C, He M. miR-141-3p is a key negative regulator of the EGFR pathway in osteosarcoma. *Onco Targets Ther*. 2018; 11:4461–78. <https://doi.org/10.2147/OTT.S171304>  
PMID:[30104888](https://pubmed.ncbi.nlm.nih.gov/30104888/)  
Retraction in: *Onco Targets Ther*. 2023; 16:497–8. <https://doi.org/10.2147/OTT.S428160>  
PMID:[30104888](https://pubmed.ncbi.nlm.nih.gov/30104888/)
4. Wang J, He M, Wang G, Fu Q. Organic Gallium Treatment Improves Osteoporotic Fracture Healing Through Affecting the OPG/RANKL Ratio and Expression of Serum Inflammatory Cytokines in Ovariectomized Rats. *Biol Trace Elem Res*. 2018; 183:270–9.

<https://doi.org/10.1007/s12011-017-1123-y>

PMID:[28836172](#)

5. Chen J, Yan C, Yu H, Zhen S, Yuan Q. miR-548d-3p inhibits osteosarcoma by downregulating *KRAS*. *Aging* (Albany NY). 2019; 11:5058–69.  
<https://doi.org/10.18632/aging.102097>  
PMID:[31327761](#)
6. Shan L, Liu W, Zhan Y. Sulfated polysaccharide of *Sepiella maindroni* ink targets Akt and overcomes resistance to the FGFR inhibitor AZD4547 in bladder cancer. *Aging* (Albany NY). 2019; 11:7780–95.  
<https://doi.org/10.18632/aging.102286>  
PMID:[31545294](#)  
Retraction in: *Aging* (Albany NY). 2024; 16:12652-12653. <https://doi.org/10.18632/aging.206104>  
PMID: [39348489](#)
7. Zhao Z, Gao D, Ma T, Zhang L. MicroRNA-141 suppresses growth and metastatic potential of head and neck squamous cell carcinoma. *Aging* (Albany NY). 2019; 11:921–32.  
<https://doi.org/10.18632/aging.101791>  
PMID:[30737360](#)
8. Wang W, Zhang L, Gao W, Zhang D, Zhao Z, Bao Y. miR-489 promotes apoptosis and inhibits invasiveness of glioma cells by targeting PAK5/RAF1 signaling pathways. *Oncol Rep*. 2019; 42:2390–401. <https://doi.org/10.3892/or.2019.7381>  
PMID:[31638257](#)  
Retraction in: *Oncol Rep*. 2023; 49:127. <https://doi.org/10.3892/or.2023.8564>  
PMID:[31638257](#)
9. Wang H, Guo B, Lin S, Chang P, Tao K. Apigenin inhibits growth and migration of fibroblasts by suppressing FAK signaling. *Aging* (Albany NY). 2019; 11:3668–78.  
<https://doi.org/10.18632/aging.102006>  
PMID:[31170089](#)
10. Zhou H, Huang Z, Chen X, Chen S. miR-98 inhibits expression of TWIST to prevent progression of non-small cell lung cancers. *Biomed Pharmacother*. 2017; 89:1453–61.  
<https://doi.org/10.1016/j.biopha.2017.01.012>  
PMID:[28415380](#)
11. Liu Y, Liu T, Jin H, Yin L, Yu H, Bi J. MiR-411 suppresses the development of bladder cancer by regulating ZnT1. *Onco Targets Ther*. 2018; 11:8695–704.  
<https://doi.org/10.2147/OTT.S173750>  
PMID:[30584327](#)
12. Guo B, Su J, Zhang T, Wang K, Li X. Fangchinoline as a kinase inhibitor targets FAK and suppresses FAK-mediated signaling pathway in A549. *J Drug Target*. 2015; 23:266–74.  
<https://doi.org/10.3109/1061186X.2014.992898>  
PMID:[25539072](#)
